# Supplementary material
Source: publisher site journal article supplement (https://www.dovepress.com/article/351068)
Supplement: Supplementary file 1 [file get_supplementary_file.php]

**Supplementary material**

**Supplementary Figure 1: Flowchart of study process**

Total hospitalized patients between July 2017 and April 2018 (n=1234)

Exclusion (n=476)

presence of carcinomatous cachexia (n=37)

hemodialysis (n=5)

peritoneal dialysis (n=1)

acute renal insufficiency (n=23)

severe diseases (including acute myocardial infarction, acute heart failure, acute stroke, severe infection) (n=184)

no record of serum creatinine and cystatin C (n=226)

All patients underwent nutritional status assessment and sarcopenia aassessment

in the first 24 h of hospital stay

Final samples of baseline (n=758)

The median of the follow-up period was 212 days

112 patients died
